# Supplementary material for: Probing DNA selectivity of ruthenium metallointercalators using ESI mass spectrometryElectronic supplementary information (ESI) available: table of mass spectral assignments. See http://www.rsc.org/suppdata/cc/b2/b212132h/
Source: Royal Society of Chemistry journal article supplement (doi:10.1039/b212132h), 2003-02-10
Supplement: b212132h.doc [file b212132h.doc]

#### Supplementary data

#### Table of mass spectral assignments

| Assignment | **Observed *m/z*** | **Calculated *m/z*** |
| --- | --- | --- |
| [D2-6H]6- | 1626.5 | 1626.4 |
| [D2-5H]5- | 1952.5 | 1951.9 |
| [D2+Ru(phen)3-8H]6- | 1733.5 | 1732.9 |
| [D2+Ru(phen)3-7H]5- | 2080.1 | 2079.7 |
| [D2+Ru(phen)3-10H]6- | 1840.1 | 1839.4 |
| [D2+Ru(phen)3-9H]5- | 2208.1 | 2207.5 |
| [D2+Ru(phen)2(dppz)-8H]6- | 1750.4 | 1749.9 |
| [D2+Ru(phen)2(dppz)-7H]5- | 2100.5 | 2100.1 |
| [D2+2Ru(phen)2(dppz)-10H]6- | 1874.1 | 1873.4 |
| [D2+2Ru(phen)2(dppz)-9H]5- | 2248.9 | 2248.3 |
| [D2+3Ru(phen)2(dppz)-12H]6- | 1997.6 | 1997.0 |
| [D2+3Ru(phen)2(dppz)-11H]5- | 2397.6 | 2396.6 |
| [D2+4Ru(phen)2(dppz)-15H]7- | 1818.4 | 1817.4 |
| [D2+4Ru(phen)2(dppz)-14H]6- | 2121.5 | 2120.5 |
| [D2+4Ru(phen)2(dppz)-13H]5- | 2546.1 | 2544.8 |
| [D2+5Ru(phen)2(dppz)-17H]7- | 1924.1 | 1923.3 |
| [D2+5Ru(phen)2(dppz)-16H]6- | 2244.8 | 2244.0 |
| [D2+5Ru(phen)2(dppz)-15H]5- | 2694.5 | 2693.0 |
